# Supplementary material for: The effectiveness of the combined mind mapping and problem-based learning method in the clinical practical teaching of ectopic pregnancy
Source: Research Square preprint supplement (doi:10.21203/rs.3.rs-6188914/v1), 2025-04-21
Supplement: Supplementary file 1 [file 01ad3e4acaeecd98b27e7e16.docx]

**Supplementary Table 1** The anonymous questionnaire contents

| **Content** | **worse** | **poor** | **average** | **good** | **excellent** |
| --- | --- | --- | --- | --- | --- |
| 1 | 2 | 3 | 4 | 5 |
| 1. Promotion of learning initiative |  |  |  |  |  |
| 2. Understanding of the knowledge points of this class |  |  |  |  |  |
| 3. Enhanced interaction between teachers and students |  |  |  |  |  |
| 4. Improvement of communication skills |  |  |  |  |  |
| 5. Improvement of clinical thinking ability |  |  |  |  |  |
| 6. Improvement of self-learning ability |  |  |  |  |  |
| 7. Improvement of teamwork skills |  |  |  |  |  |
| 8. Memory of knowledge of this course |  |  |  |  |  |
| 9. Satisfaction of this class |  |  |  |  |  |
